# Supplementary material for: Component Engineering of Multiphase Nickel Sulfide-Based Bifunctional Electrocatalysts for Efficient Overall Water Splitting
Source: MDPI journal article supplement (doi:10.3390/coatings13111938), 2023-11-14
Supplement: s1 [file s1]

# Supplementary Materials: Component Engineering of Multiphase Nickel Sulfide-Based Bifunctional Electrocatalysts for Efficient Overall Water Splitting

Nianrui Qu <sup>1</sup>, Lu Han <sup>1</sup>, Tianhui Wu <sup>1,\*</sup>, Qingzhi Luo <sup>2</sup>, Shoufeng Tang <sup>1,\*</sup>, Jianmin Gu <sup>1</sup> and Desong Wang <sup>1,2,\*</sup>

**Citation:** Qu, N.; Han, L.; Wu, T.; Luo, Q.; Tang, S.; Gu, J.; Wang, D. Component Engineering of Multiphase Nickel Sulfide-Based Bifunctional Electrocatalysts for Efficient Overall Water Splitting. *Coatings* **2023**, *13*, 1938. <https://doi.org/10.3390/coatings13111938>

<sup>1</sup> State Key Laboratory of Metastable Materials Science and Technology (MMST), Hebei Key Laboratory of Applied Chemistry, Yanshan University, Qinhuangdao 066004, China; qunianrui@ysu.edu.cn (N.Q.); hlhm19980515@163.com (L.H.); jmgu@ysu.edu.cn (J.G.)

<sup>2</sup> School of Sciences, Hebei University of Science and Technology, Shijiazhuang 050018, China; lqz2004-1@163.com

\* Correspondence: wth@ysu.edu.cn (T.W.); tangshf@ysu.edu.cn (S.T.); dswang06@126.com (D.W.)

Academic Editor: Aivaras Kareiva

Received: 16 October 2023

Revised: 7 November 2023

Accepted: 11 November 2023

Published: 14 November 2023

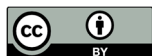

**Copyright:** © 2023 by the authors.

Submitted for possible open access

publication under the terms and

conditions of the Creative Commons

Attribution (CC BY) license

([https://creativecommons.org/licenses](https://creativecommons.org/licenses/by/4.0/)

/by/4.0/).

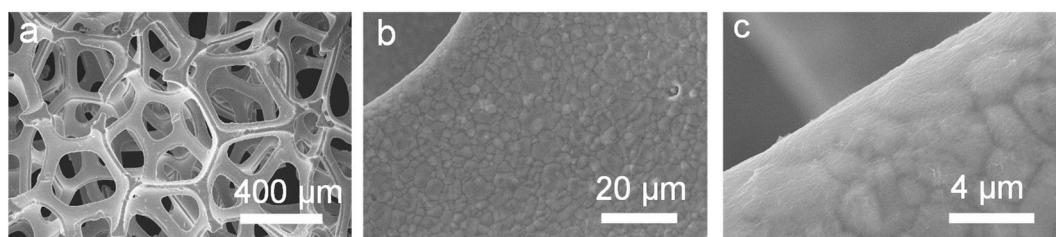

**Figure S1.** (a-c) The different magnification SEM images of NF surface.

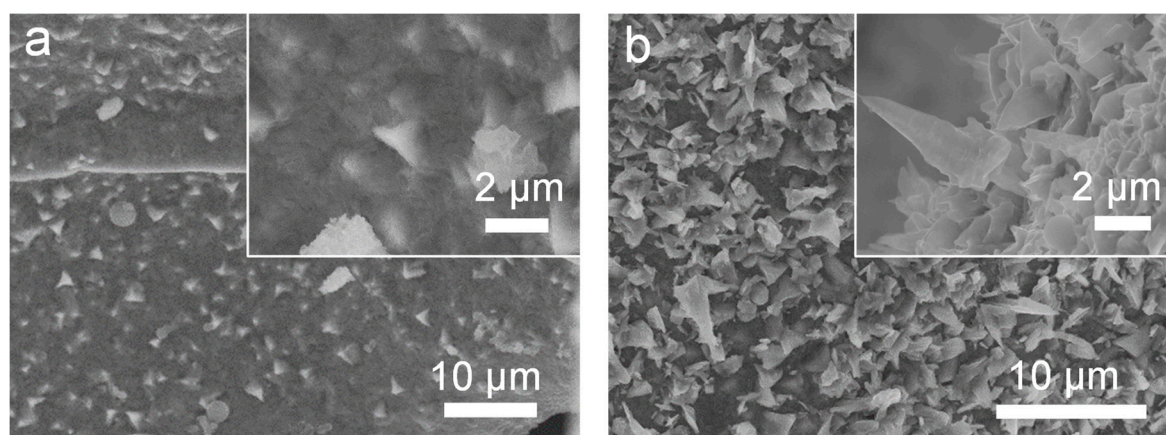

**Figure S2.** SEM images of  $\text{Ni}_x\text{S}_y-2$  (a),  $\text{Ni}_x\text{S}_y-3$  (b). The insets exhibit the corresponding high magnification SEM image, respectively.

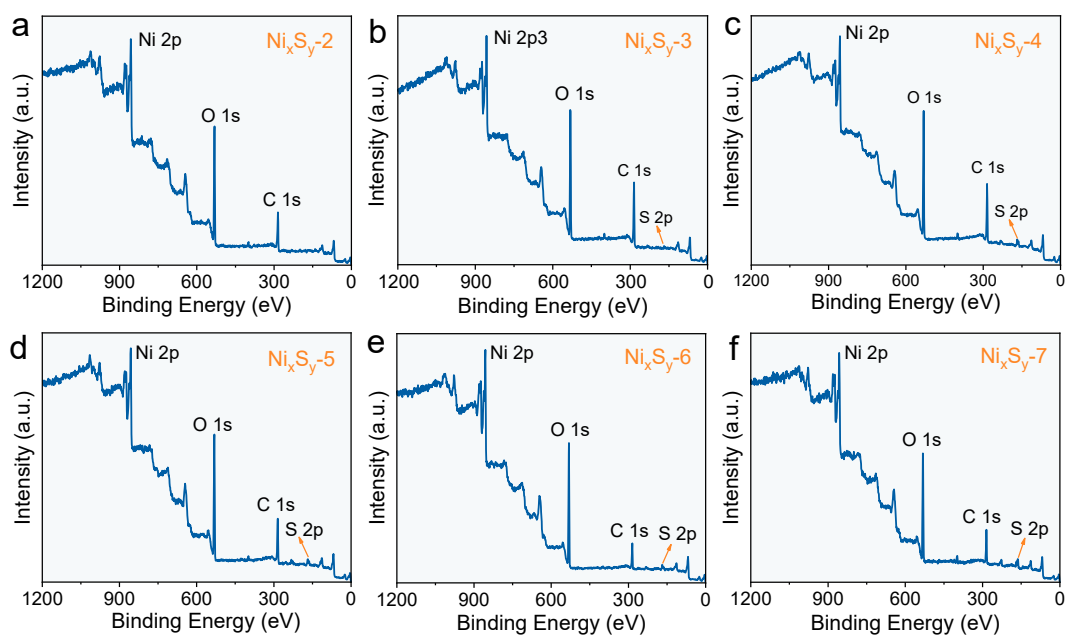

**Figure S3.** XPS spectra of the survey spectrum for  $\text{Ni}_x\text{S}_y-2$  (a),  $\text{Ni}_x\text{S}_y-3$  (b),  $\text{Ni}_x\text{S}_y-4$  (c),  $\text{Ni}_x\text{S}_y-5$  (d),  $\text{Ni}_x\text{S}_y-6$  (e), and  $\text{Ni}_x\text{S}_y-7$  (f), respectively.

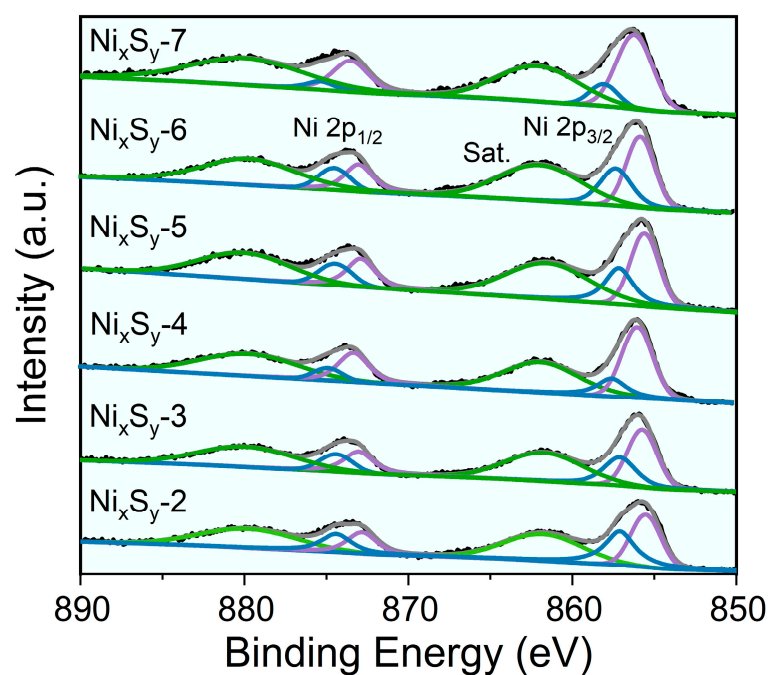

**Figure S4.** XPS spectra of the Ni 2p spectrum for all the as-prepared samples.

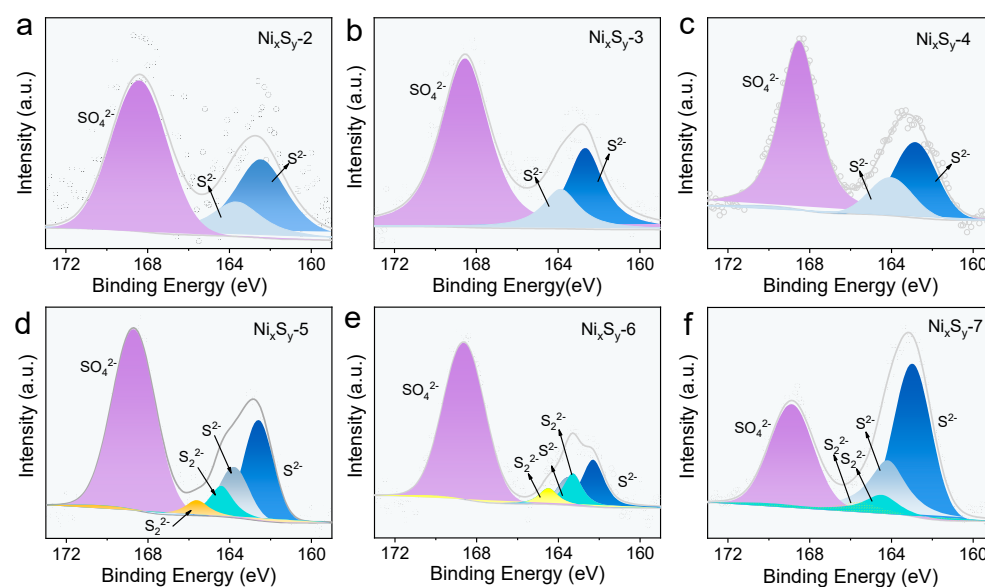

**Figure S5.** XPS spectra of the S 2p spectrum for  $\text{Ni}_x\text{S}_y$ -2 (a),  $\text{Ni}_x\text{S}_y$ -3 (b),  $\text{Ni}_x\text{S}_y$ -4 (c),  $\text{Ni}_x\text{S}_y$ -5 (d),  $\text{Ni}_x\text{S}_y$ -6 (e), and  $\text{Ni}_x\text{S}_y$ -7 (f), respectively.

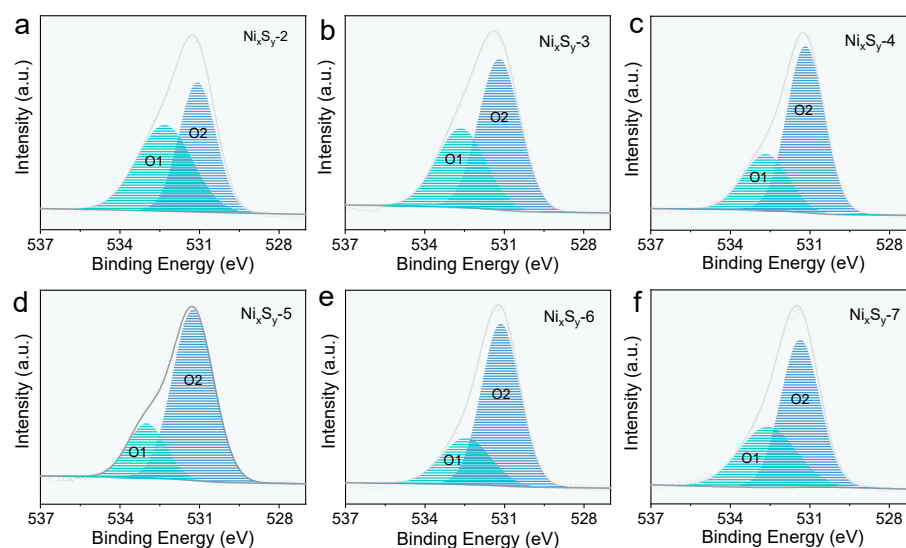

**Figure S6.** XPS spectra of the O 1s spectrum for  $\text{Ni}_x\text{S}_y$ -2 (a),  $\text{Ni}_x\text{S}_y$ -3 (b),  $\text{Ni}_x\text{S}_y$ -4 (c),  $\text{Ni}_x\text{S}_y$ -5 (d),  $\text{Ni}_x\text{S}_y$ -6 (e), and  $\text{Ni}_x\text{S}_y$ -7 (f), respectively.

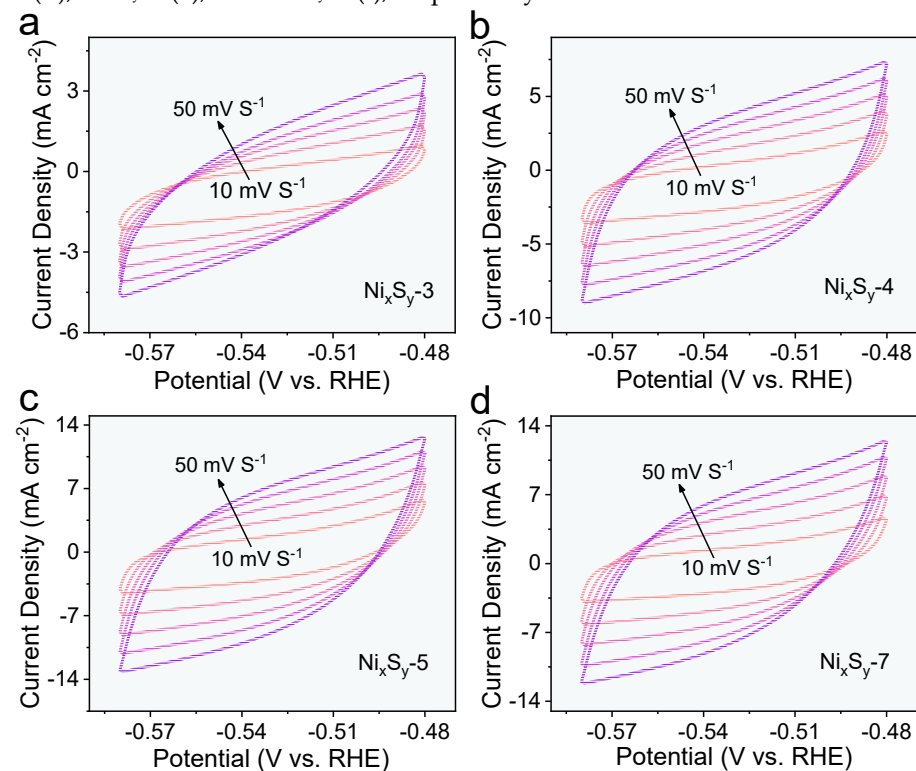

**Figure S7.** CV curves of the  $\text{Ni}_x\text{S}_y$ -3 (a),  $\text{Ni}_x\text{S}_y$ -4 (b),  $\text{Ni}_x\text{S}_y$ -5 (c),  $\text{Ni}_x\text{S}_y$ -6 (d), respectively, for HER process.

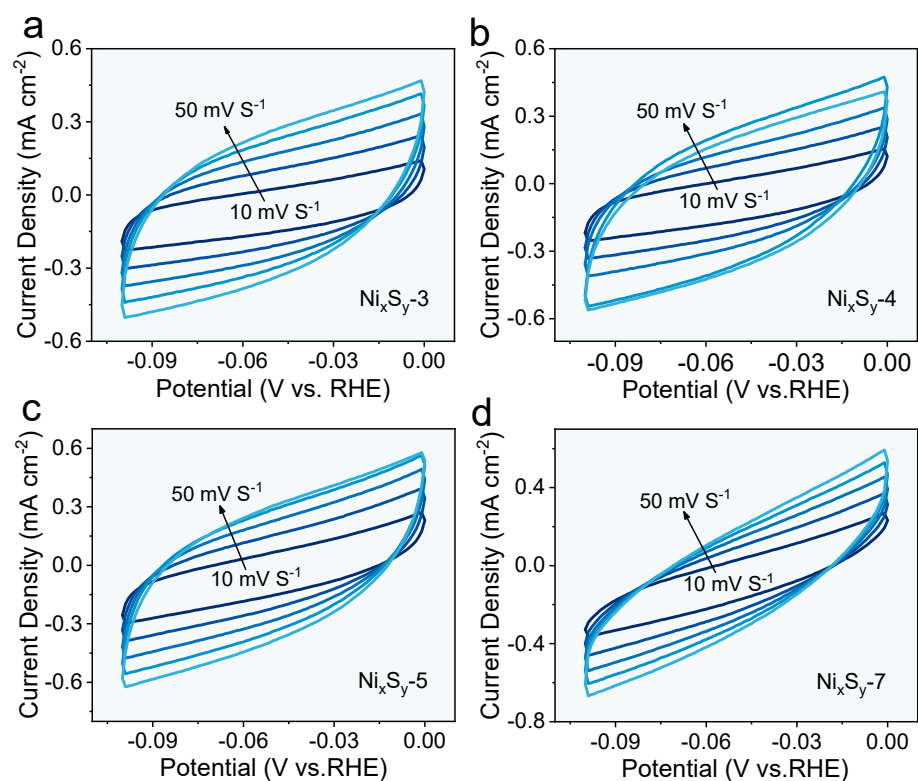

**Figure S8.** CV curves of the  $\text{Ni}_x\text{S}_y\text{-3}$  (a),  $\text{Ni}_x\text{S}_y\text{-4}$  (b),  $\text{Ni}_x\text{S}_y\text{-5}$  (c),  $\text{Ni}_x\text{S}_y\text{-6}$  (d), respectively, for OER process.

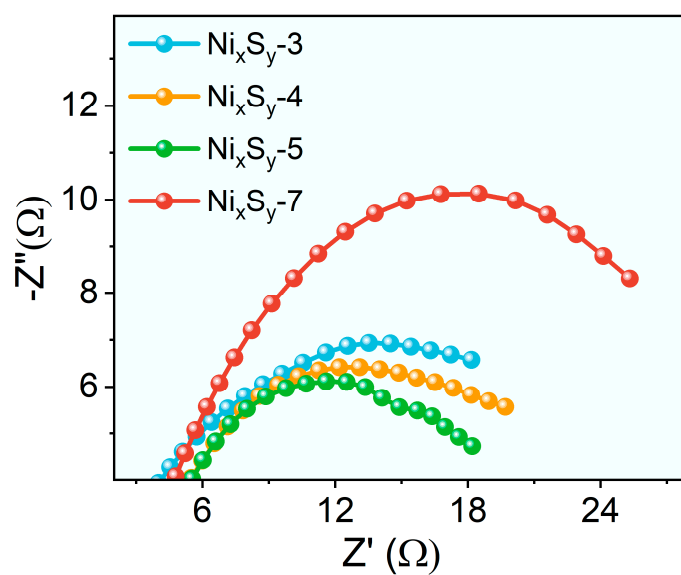

**Figure S9.** The corresponding EIS plot for  $\text{Ni}_x\text{S}_y\text{-3}$  electrode,  $\text{Ni}_x\text{S}_y\text{-4}$  electrode,  $\text{Ni}_x\text{S}_y\text{-5}$  electrode, and  $\text{Ni}_x\text{S}_y\text{-7}$  electrode.

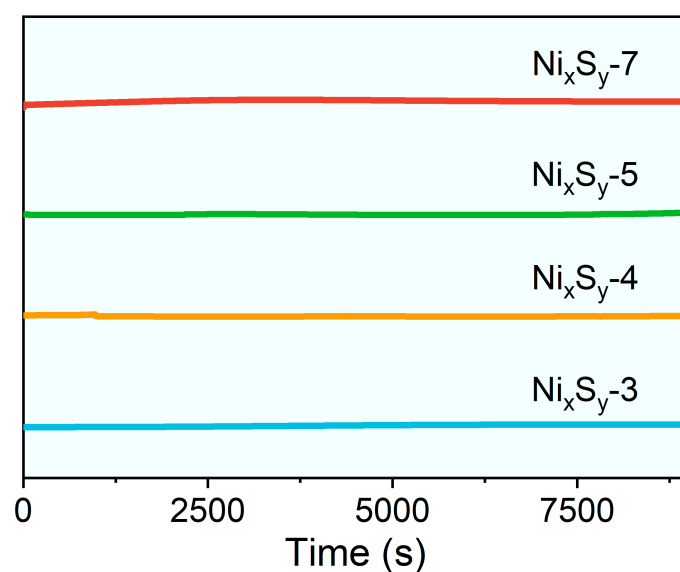

**Figure S10.** The stability test toward HER at constant current density of  $10 \text{ mA cm}^{-2}$  for  $\text{Ni}_x\text{S}_y$ -3 electrode,  $\text{Ni}_x\text{S}_y$ -4 electrode,  $\text{Ni}_x\text{S}_y$ -5 electrode, and  $\text{Ni}_x\text{S}_y$ -7 electrode.

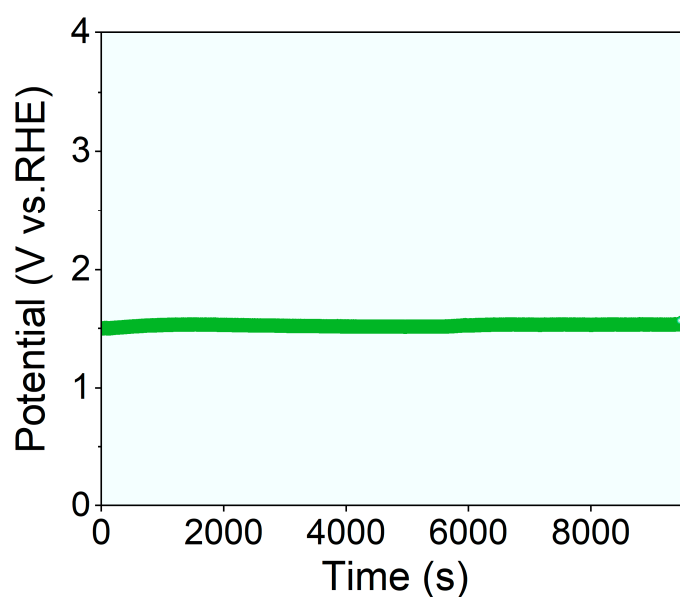

**Figure S11.** Stability test of overall water splitting at constant current density of  $10 \text{ mA cm}^{-2}$  for  $\text{Ni}_x\text{S}_y$ -5 electrolyzer.

**Table S1.** Summary of the HER activities of recently reported non-noble metal-based electrocatalysts in 1 M KOH.

| Catalysts                            | Tafel<br>( $\text{mV dec}^{-1}$ ) | $\eta_{10}$ (mV) | Reference                                                  |
|--------------------------------------|-----------------------------------|------------------|------------------------------------------------------------|
| NiCoP                                | 64.4                              | 178              | <i>Adv. Energy Mater.</i> <b>2018</b> , <i>8</i> , 1802615 |
| $\text{Co}_4\text{Mo}_2\text{@NC}$   | 73.5                              | 218              | <i>J. Mater. Chem. A</i> , <b>2017</b> , <i>5</i> , 16929  |
| CoP NFs                              | 56.2                              | 136              | <i>ACS Catal.</i> <b>2020</b> , <i>10</i> , 412            |
| $\text{Co}_3\text{O}_4/\text{MoS}_2$ | 98                                | 205              | <i>Appl. Catal., B</i> <b>2019</b> , <i>248</i> , 202      |
| $\text{NiS}_2$ NA                    | 104                               | 149              | <i>Electrochim. Acta</i> <b>2015</b> , <i>153</i> , 508    |

|                                                   |      |     |                                                              |
|---------------------------------------------------|------|-----|--------------------------------------------------------------|
| NiCo <sub>2</sub> S <sub>4</sub> NW               | 58.9 | 210 | <i>Adv. Funct. Mater.</i> <b>2016</b> , <i>26</i> , 4661     |
| Mo <sub>2</sub> NiB <sub>2</sub>                  | 71   | 160 | <i>Small</i> <b>2022</b> , <i>18</i> , 2104303               |
| NiCoP                                             | 83   | 130 | <i>Adv. Energy Mater.</i> <b>2018</b> , <i>8</i> , 1800555   |
| K <sub>2</sub> Fe <sub>4</sub> O <sub>7</sub> /NF | 47.1 | 109 | <i>J. Mater. Chem. A</i> <b>2021</b> , <i>9</i> , 7586       |
| MoB                                               | 59   | 225 | <i>Angew. Chem. Int. Ed.</i> <b>2012</b> , <i>51</i> , 12703 |
| Ni <sub>x</sub> S <sub>y</sub> -5                 | 140  | 148 | This work                                                    |

**Table S2.** Summary of the OER activities of recently reported non-noble metal-based electrocatalysts.

| Catalysts                                         | Tafel (mV dec <sup>-1</sup> ) | $\eta_{10}$ (mV) | Reference                                                        |
|---------------------------------------------------|-------------------------------|------------------|------------------------------------------------------------------|
| Mo <sub>2</sub> C/NCF                             | 55                            | 144              | <i>ACS Nano</i> <b>2016</b> , <i>10</i> , 11337                  |
| CeO <sub>x</sub> /CoS                             | 50                            | 269              | <i>Angew. Chem. Int., Ed.</i> <b>2018</b> , <i>57</i> , 8654     |
| CoNiB                                             | 120                           | 302.4            | <i>J. Mater. Chem. A</i> <b>2021</b> , <i>9</i> , 6469           |
| Mo <sub>2</sub> NiB <sub>2</sub>                  | 57                            | 280              | <i>Small</i> <b>2022</b> , <i>18</i> , 2104303                   |
| Mo-CoOOH                                          | 68                            | 305              | <i>Nano Energy</i> , <b>2018</b> , <i>48</i> , 73                |
| RuO <sub>2</sub> /NF                              | 128                           | 257              | <i>J. Energy Chem.</i> <b>2022</b> , <i>70</i> , 472             |
| K <sub>2</sub> Fe <sub>4</sub> O <sub>7</sub> /NF | 59                            | 308              | <i>J. Mater. Chem. A</i> , <b>2021</b> , <i>9</i> , 7586         |
| h-NiS <sub>x</sub>                                | 96                            | 180              | <i>Adv. Energy Mater.</i> <b>2016</b> , <i>6</i> , 1502333       |
| Fe-Ni <sub>3</sub> S <sub>2</sub> /FeNi           | 54                            | 282              | <i>Small</i> , <b>2017</b> , <i>13</i> , 1604161                 |
| CoNi <sub>2</sub> Se <sub>4</sub>                 | 72                            | 160              | <i>Chem. Commun.</i> <b>2017</b> , <i>53</i> , 5412              |
| CoOOH/Co <sub>9</sub> S <sub>8</sub>              | 86.4                          | 240              | <i>Angew. Chem. Int., Ed.</i> <b>2022</b> , <i>61</i> , e2021171 |
| Co/WN-600                                         | 65                            | 232              | <i>J. Mater. Chem. A</i> , <b>2020</b> , <i>8</i> , 22938        |
| Ag/Co(OH) <sub>x</sub>                            | 76                            | 250              | <i>Angew. Chem., Int. Ed.</i> <b>2020</b> , <i>59</i> , 7245     |
| Ni-MoN                                            | 98                            | 276              | <i>Adv. Energy Mater.</i> <b>2018</b> , <i>8</i> , 1802327       |
| Ni <sub>0.6</sub> Co <sub>1.4</sub> P             | 80                            | 300              | <i>Adv. Funct. Mater.</i> <b>2018</b> , <i>28</i> , 1706008      |
| Ni <sub>x</sub> S <sub>y</sub> -5                 | 60                            | 111              | This work                                                        |

**Table S3.** Comparison of electrocatalytic performance of Ni<sub>x</sub>S<sub>y</sub>-5 with recently reported bifunctional electrocatalysts for overall-water-splitting in alkaline media.

| Catalysts                                        | Electrolyte | $\eta_{10}$ (V) | Reference                                                    |
|--------------------------------------------------|-------------|-----------------|--------------------------------------------------------------|
| Pt/C-RuO <sub>2</sub>                            | 1 M KOH     | 1.67 V          | <i>Appl. Catal., B</i> <b>2020</b> , <i>278</i> , 119281     |
| MoS <sub>2</sub> /Ni <sub>3</sub> S <sub>2</sub> | 1 M KOH     | 1.56            | <i>Angew. Chem., Int. Ed.</i> <b>2016</b> , <i>55</i> , 6702 |

|                                                   |         |      |                                                                  |
|---------------------------------------------------|---------|------|------------------------------------------------------------------|
| NiCo <sub>2</sub> S <sub>4</sub> /NF              | 1 M KOH | 1.61 | <i>Adv. Mater. Interfaces</i> , <b>2018</b> , <i>5</i> , 1701396 |
| Co <sub>3</sub> O <sub>4</sub> /MoS <sub>2</sub>  | 1 M KOH | 205  | <i>Appl. Catal. B-Environ.</i> <b>2019</b> , <i>248</i> , 202    |
| Mo-CoOOH                                          | 1 M KOH | 1.56 | <i>Nano Energy</i> , <b>2018</b> , <i>48</i> , 73                |
| CoP NFs                                           | 1 M KOH | 1.65 | <i>ACS Catal.</i> <b>2020</b> , <i>10</i> , 412                  |
| Co <sub>3</sub> O <sub>4</sub> NCs                | 1 M KOH | 1.91 | <i>Chem. Commun.</i> <b>2015</b> , <i>51</i> , 8066              |
| K <sub>2</sub> Fe <sub>4</sub> O <sub>7</sub> /NF | 1 M KOH | 1.59 | <i>J. Mater. Chem. A</i> <b>2021</b> , <i>9</i> , 7586           |
| Mo <sub>2</sub> NiB <sub>2</sub>                  | 1 M KOH | 1.57 | <i>Small</i> <b>2022</b> , <i>18</i> , 2104303                   |
| NiCo <sub>2</sub> S <sub>4</sub>                  | 1 M KOH | 1.58 | <i>Adv. Funct. Mater.</i> <b>2019</b> , <i>29</i> , 1807031      |
| Ni <sub>x</sub> S <sub>y</sub> -5                 | 1 M KOH | 1.48 | This work                                                        |
